# Supplementary material
Source: publisher site journal article supplement (https://www.spandidos-publications.com/3712/downloadSupplementary)
Supplement: Supplementary file 1 [file downloadSupplementary]

Figure S1. DNA fingerprinting analysis. T24 and J82 cells were validated via DNA fingerprinting analysis.

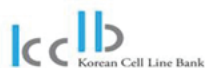

## STR Profile Results

| Sample        | Amelogenin   | D3S1358      | D1S1656      | D2S441       | D10S1248     | D13S317      | pentaE       | D16S539      | D18S51       |
|---------------|--------------|--------------|--------------|--------------|--------------|--------------|--------------|--------------|--------------|
| T24 (control) | X            | 16           | 12,15        | 11,15        | 14           | 12           | 7,10         | 9            | 16,18        |
| <b>T24</b>    | <b>X</b>     | <b>16</b>    | <b>12,15</b> | <b>11,15</b> | <b>14</b>    | <b>12</b>    | <b>7,10</b>  | <b>9</b>     | <b>16,18</b> |
| J82 (control) | X,Y          | 16,18        | 14           | 10,13        | 13           | 10,12        | 12,15        | 11,12        | 10,12        |
| <b>J82</b>    | <b>X,Y</b>   | <b>16,18</b> | <b>14</b>    | <b>10,13</b> | <b>13</b>    | <b>10,12</b> | <b>12,15</b> | <b>11,12</b> | <b>10,12</b> |
| Sample        | D2S1338      | CSF1PO       | PentaD       | TH01         | Vwa          | D21S11       | D7S820       | D5S818       | TPOX         |
| T24 (control) | 20,23        | 10,12        | 11,15        | 6            | 17           | 29           | 10,11        | 10,12        | 8,11         |
| <b>T24</b>    | <b>20,23</b> | <b>10,12</b> | <b>11,15</b> | <b>6</b>     | <b>17</b>    | <b>29</b>    | <b>10,11</b> | <b>10,12</b> | <b>8,11</b>  |
| J82 (control) | 19           | 10,11        | 9,13         | 9.3          | 17,18        | 30,31        | 9,11         | 12,13        | 11,12        |
| <b>J82</b>    | <b>19</b>    | <b>10,11</b> | <b>9,13</b>  | <b>9.3</b>   | <b>17,18</b> | <b>30,31</b> | <b>9,11</b>  | <b>12,13</b> | <b>11,12</b> |
| Sample        | D8S1179      | D12S391      | D19S433      | D6S1043      | D22S1045     | DYS391       | FGA          | DYS576       | DYS570       |
| T24 (control) | 14           | 17,18        | 13,14        | 11           | 16           | -            | 17,22        | -            | -            |
| <b>T24</b>    | <b>14</b>    | <b>17,18</b> | <b>13,14</b> | <b>11</b>    | <b>16</b>    | <b>-</b>     | <b>17,22</b> | <b>-</b>     | <b>-</b>     |
| J82 (control) | 8,13         | 24           | 12,13        | 19           | 16           | 10           | 20,24        | 17           | 21           |
| <b>J82</b>    | <b>8,13</b>  | <b>24</b>    | <b>12,13</b> | <b>19</b>    | <b>16</b>    | <b>10</b>    | <b>20,24</b> | <b>17</b>    | <b>21</b>    |

STR Kit : VersaPlex™ 27PY System PCR Amplification kit (Promega, Foster, WI, cat.DC7020)

Analysis Methods : 3500xL DNA Analyzer (Applied Biosystems, Foster, CA)

: GeneMapper v5 (Applied Biosystems, Foster, CA)

The Fingerprinting of cell lines by 'VersaPlex™ 27PY System PCR Amplification kit' was tested on August 4, 2021.

Korean Cell Line Bank  
Cancer Research Institute  
Seoul National University College of Medicine  
Seoul, Korea  
<http://cellbank.snu.ac.kr>  
Tel : 82-2-3668-7915, Fax : 82-2-742-0021
